# Supplementary material
Source: Springer Nature journal article supplement (https://www.springermedizin.de/resource/supplementary/12936_2010_1302_MOESM7_ESM.pdf/9549446)

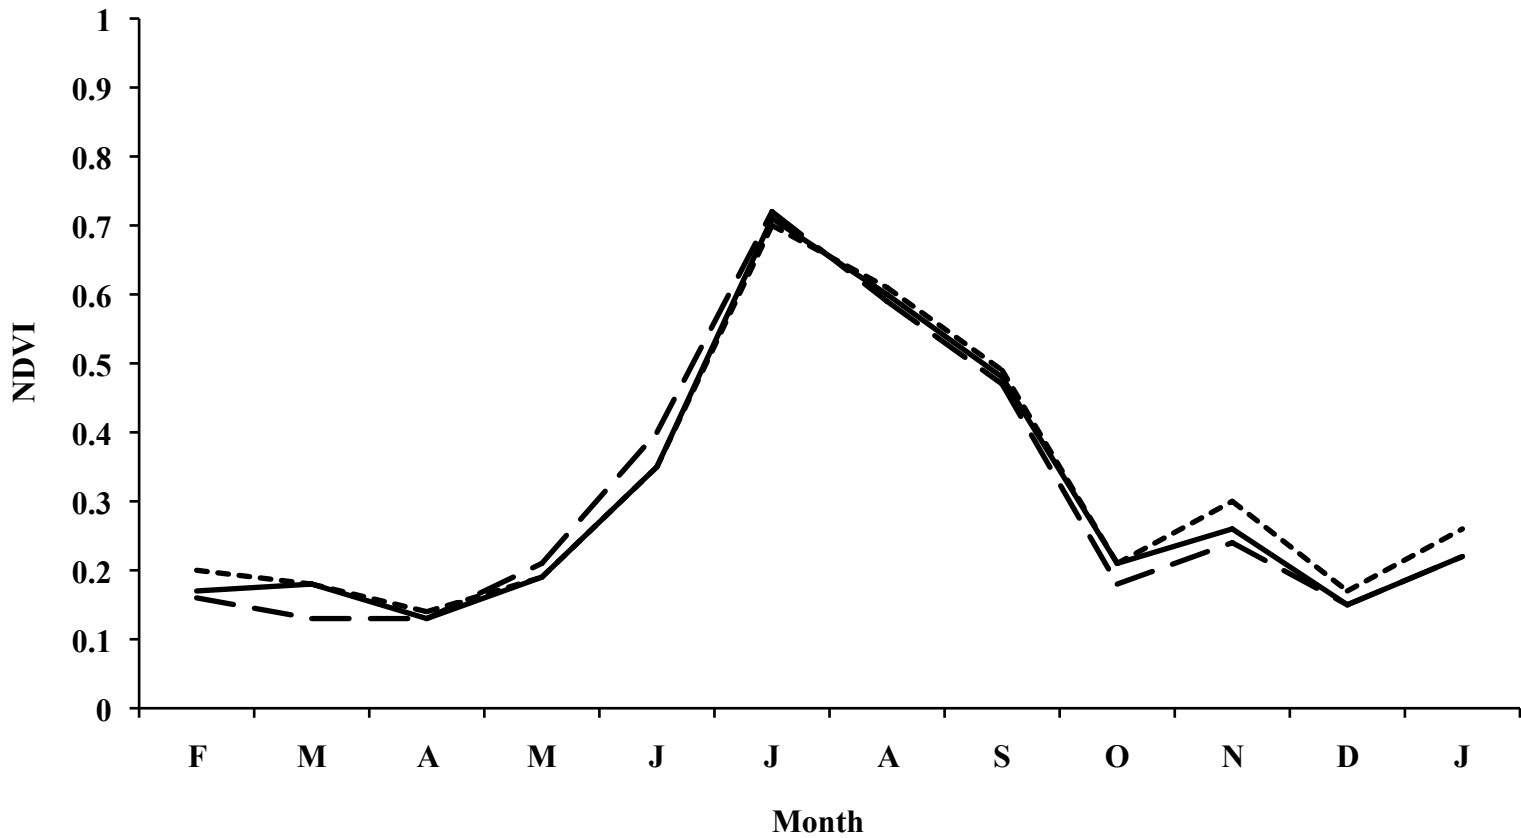

Supplement: MOESM7 [file 9549446]
